# Supplementary material for: Polyphenolic Profile, Antioxidant and Anti-Inflammatory Activity of Eastern Teaberry (Gaultheria procumbens L.) Leaf Extracts
Source: PubMed Central journal article supplement (PMC6271927; doi:10.3390/molecules191220498), 2014-12-08
Supplement: molecules-19-20498-s001.pdf [file molecules-19-20498-s001.pdf]

## Supplementary Materials

**Figure S1.** Scheme illustrating the process of sequential extraction and fractionation of the dried leaves of *Gaultheria procumbens* L.

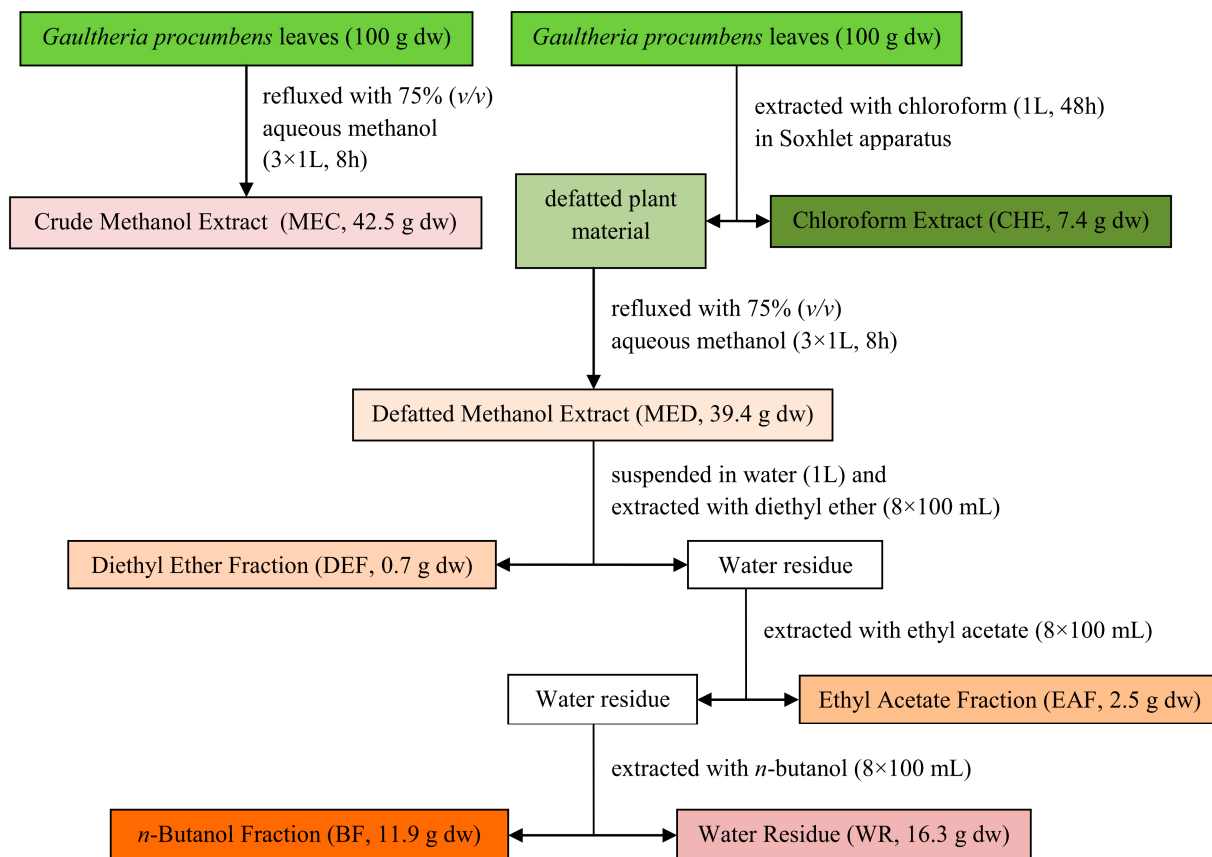

**Table S1.** Retention times, UV-Vis and MS<sup>3</sup> data for compounds detected in the analyzed *Gaultheria* extracts.

|    | Compounds                                                                    | Retention Time (min) | UV $\lambda_{\max}$ (nm) | [M-H] <sup>-</sup> <i>m/z</i> | MS <sup>2</sup> ions              | MS <sup>3</sup> ions | [M+H] <sup>+</sup> <i>m/z</i> | MS <sup>2</sup> ions              | MS <sup>3</sup> ions |
|----|------------------------------------------------------------------------------|----------------------|--------------------------|-------------------------------|-----------------------------------|----------------------|-------------------------------|-----------------------------------|----------------------|
| 1  | protocatechuic acid (PCA) <sup>a</sup>                                       | 4.4                  | 295                      | 153                           |                                   |                      | 155                           |                                   |                      |
| 2  | 3- <i>O</i> -caffeoylquinic acid (neochlorogenic acid, NCHA) <sup>a</sup>    | 6.2                  | 325                      | 353                           | 191, 179                          |                      | 377 <sup>b</sup>              | 359, 215                          |                      |
| 3  | <i>p</i> -hydroxybenzoic acid ( <i>p</i> HBA) <sup>a</sup>                   | 7.6                  | 254                      | 137                           | 93                                |                      | 139                           |                                   |                      |
| 4  | 3- <i>O</i> - <i>p</i> -coumaroylquinic acid <sup>a</sup>                    | 9.3                  | 310                      | 337                           | 163                               |                      | 339                           | 147                               |                      |
| 5  | vanillic acid <sup>a</sup>                                                   | 10.3                 | 260, 291                 | 167                           |                                   |                      | 169                           |                                   |                      |
| 6  | 5- <i>O</i> -caffeoylquinic acid (chlorogenic acid, CHA) <sup>a</sup>        | 10.7                 | 325                      | 353                           | 191, 179                          |                      | 377 <sup>b</sup>              | 359, 215                          |                      |
| 7  | (+)-catechin (CA) <sup>a</sup>                                               | 10.9                 | 280                      | 289                           | 245, 205                          |                      | 291                           | 165, 139, 123                     |                      |
| 8  | caffeic acid (CFA) <sup>a</sup>                                              | 11.7                 | 325                      | 179                           | 135                               |                      | 181                           |                                   |                      |
| 9  | 4- <i>O</i> -caffeoylquinic acid (cryptochlorogenic acid, CCHA) <sup>a</sup> | 12.6                 | 325                      | 353                           | 173                               |                      | 377 <sup>b</sup>              | 359, 215                          |                      |
| 10 | 3- <i>O</i> -feruloylquinic acid                                             | 14.2                 | 325                      | 367                           | 193                               |                      | 369                           | 163                               |                      |
| 11 | procyanidin B-type dimer                                                     | 14.9                 | 280                      | 577                           | 425, 407, 289                     | 407, 273             | 579                           | 427, 409, 291                     | 409, 301, 275        |
| 12 | unknown compound                                                             | 15.7                 | 254                      | 481                           | 385, 345, 327, 165, 153           |                      | 483                           |                                   |                      |
| 13 | (-)-epicatechin (ECA) <sup>a</sup>                                           | 16.5                 | 280                      | 289                           | 245, 205                          |                      | 291                           | 165, 139, 123                     |                      |
| 14 | 4- <i>O</i> - <i>p</i> -coumaroylquinic acid                                 | 16.6                 | 310                      | 337                           | 173                               |                      | 339                           |                                   |                      |
| 15 | unknown compound                                                             | 17.3                 | 280                      | 559                           | 542, 445, 407, 293, 265           |                      | 561                           | 295, 259, 153                     |                      |
| 16 | <i>p</i> -coumaric acid ( <i>p</i> CA) <sup>a</sup>                          | 19.1                 | 310                      | 163                           | 119                               |                      | 165                           |                                   |                      |
| 17 | procyanidin A-type trimer (PA)                                               | 19.8                 | 280                      | 863                           | 711, 693, 573, 559, 451, 411, 289 | 693, 559, 407, 285   | 865                           | 713, 695, 575, 533, 453, 411, 287 | 695, 543, 409, 287   |
| 18 | procyanidin B-type trimer                                                    | 20.8                 | 280                      | 865                           | 713, 695, 577, 407, 287           | 695, 561, 407, 245   | 867                           | 715, 699, 579, 427, 407, 287,     | 697, 545, 425, 245   |
| 19 | procyanidin A-type dimer                                                     | 22.1                 | 280                      | 575                           | 499, 423, 407, 289                |                      | 577                           | 492, 407, 289, 165                |                      |
| 20 | unknown compound                                                             | 22.2                 | 267, 298                 | 639                           | 319, 183                          | 183, 165, 153        | 641                           |                                   |                      |
| 21 | caffeoylquinic acid derivative                                               | 22.4                 | 325                      | 391                           | 179                               |                      | 393                           |                                   |                      |

Table S1. Cont.

|    | Compounds                                                         | Retention Time (min) | UV $\lambda_{\max}$ (nm) | [M-H] <sup>-</sup> <i>m/z</i> | MS <sup>2</sup> ions    | MS <sup>3</sup> ions    | [M+H] <sup>+</sup> <i>m/z</i> | MS <sup>2</sup> ions | MS <sup>3</sup> ions    |
|----|-------------------------------------------------------------------|----------------------|--------------------------|-------------------------------|-------------------------|-------------------------|-------------------------------|----------------------|-------------------------|
| 22 | unknown compound                                                  | 24.3                 | 280                      | 473                           | 427, 293                |                         | 475                           | 457, 431, 249, 166   |                         |
| 23 | quercetin pentoside-glucuronide                                   | 24.9                 | 257, 356                 | 609                           | 482, 301                | 301                     | 611                           | 479, 303             | 303                     |
| 24 | procyanidin A-type trimer                                         | 25.1                 | 280                      | 863                           | 711, 573, 559, 451, 411 | 693, 559, 542, 407      | 865                           | 713, 533, 407, 287   | 695, 543, 409, 287      |
| 25 | unknown compound                                                  | 26.3                 | 280                      | 451                           | 341                     |                         | 453                           | 343, 301, 191        | 191                     |
| 26 | quercetin 3- <i>O</i> -galactoside (hyperoside, HY) <sup>a</sup>  | 27.2                 | 254, 353                 | 463                           | 301                     | 271, 255, 179, 151      | 465                           | 303                  | 285, 257, 229, 165      |
| 27 | quercetin 3- <i>O</i> -glucoside (isoquercitrin, IQ) <sup>a</sup> | 28.1                 | 256, 353                 | 463                           | 301                     | 271, 255, 179, 151      | 465                           | 303                  | 285, 257, 229, 165      |
| 28 | quercetin 3- <i>O</i> -glucuronide (miquelianin, MQ) <sup>a</sup> | 28.8                 | 256, 356                 | 477                           | 301                     | 273, 257, 179, 151      | 479                           | 303                  | 285, 257, 229, 165      |
| 29 | quercetin 3- <i>O</i> -arabinoside (guajiverin, GV) <sup>a</sup>  | 30.3                 | 258, 356                 | 433                           | 301                     | 271, 255, 229, 179, 151 | 435                           | 303                  | 285, 257, 229, 165      |
| 30 | quercetin derivative                                              | 30.6                 | 258, 354                 | 333                           | 301, 165                | 165                     | 335                           | 303, 137             |                         |
| 31 | kaempferol 3- <i>O</i> -glucuronide                               | 33.0                 | 265, 349                 | 461                           | 285                     | 257, 229, 163, 151      | 463                           | 287                  | 259, 231, 213, 165, 153 |
| 32 | quercetin 3- <i>O</i> -glucuronide methyl ester                   | 33.9                 | 265, 356                 | 491                           | 473, 315, 301           | 301                     | 493                           | 303                  |                         |
| 33 | kaempferol 3- <i>O</i> -glucuronide methyl ester                  | 38.8                 | 265, 348                 | 475                           | 327, 285, 255           |                         | 477                           | 287                  |                         |
| 34 | unknown compound                                                  | 39.0                 | 286, 326                 | 409                           | 335, 235, 161           |                         | 411                           | 393, 249, 163        |                         |
| 35 | kaempferol 3- <i>O</i> -glucoside (astragalol, AG) <sup>a</sup>   | 39.9                 | 265, 345                 | 447                           | 285                     |                         | 449                           | 287                  | 231, 213, 165           |
| 36 | unknown compound                                                  | 40.3                 | 280                      | 451                           | 341, 217                |                         | 453                           | 343, 301             | 191                     |
| 37 | quercetin (QU) <sup>a</sup>                                       | 43.3                 | 255, 364                 | 301                           | 273, 257, 229, 179, 159 |                         | 303                           | 285, 257, 229, 165   |                         |
| 38 | unknown compound                                                  | 43.7                 | 286, 326                 | 409                           | 335, 235, 179, 161, 135 |                         | 411                           | 393, 249, 163        |                         |
| 39 | unknown compound                                                  | 44.4                 | 280                      | 435                           | 341, 297                |                         | 437                           | 343, 285, 191        | 191                     |
| 40 | quercetin 3- <i>O</i> -pentoside-glucuronide butyl ester          | 46.8                 | 268, 359                 | 665                           | 647, 533, 357, 301      | 515, 357, 301, 178      | 667                           | 535, 303, 215        | 303, 215                |
| 41 | quercetin 3- <i>O</i> -glucuronide butyl ester                    | 48.8                 | 256, 356                 | 533                           | 515, 357, 301, 179      | 301                     | 535                           | 303                  |                         |
| 42 | kaempferol 3- <i>O</i> -pentoside-glucuronide butyl ester         | 50.1                 | 268, 350                 | 649                           | 631, 533, 499, 285, 255 |                         | 651                           | 519, 287, 215        | 287                     |
| 43 | kaempferol (KA) <sup>a</sup>                                      | 50.4                 | 265, 364                 | 285                           |                         |                         | 287                           |                      |                         |
| 44 | kaempferol 3- <i>O</i> -glucuronide butyl ester                   | 50.6                 | 265, 350                 | 517                           | 285, 255                |                         | 519                           | 287                  |                         |

Notes: <sup>a</sup> comparisons with authentic standard have been made; <sup>b</sup> [M+Na]<sup>+</sup>; in bold—ions subjected to MS<sup>3</sup> fragmentation.
